# Supplementary material
Source: PubMed Central journal article supplement (PMC5924481)

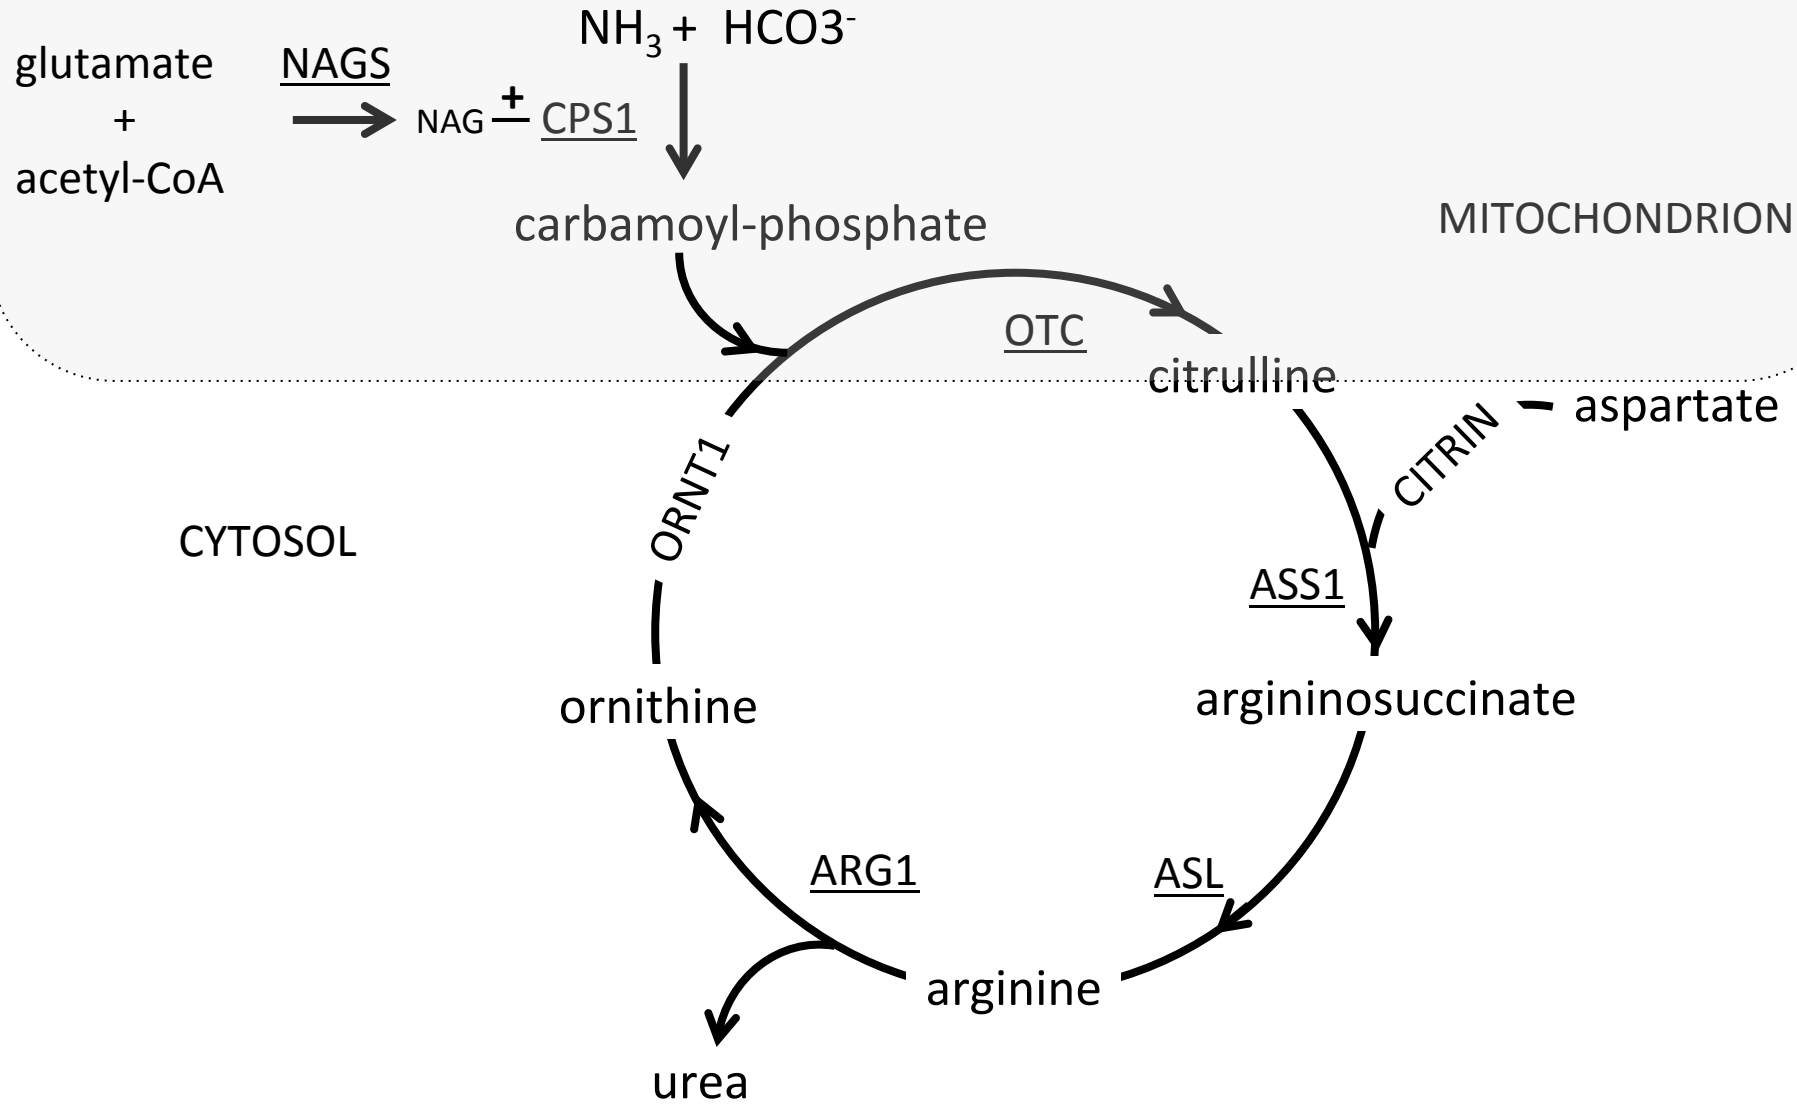

Supplement: NIHMS903128-supplement-Figure_S1.pdf [file NIHMS903128-supplement-Figure_S1.pdf]

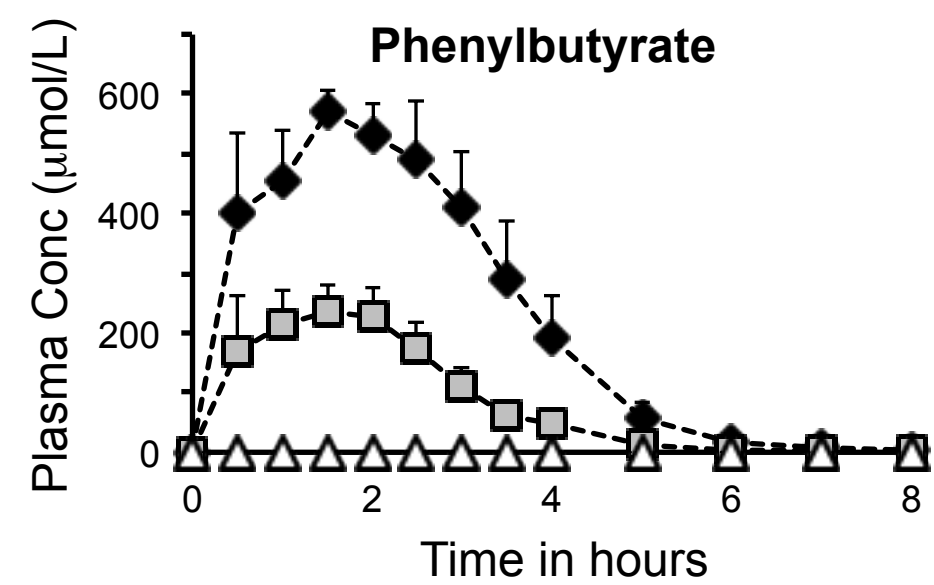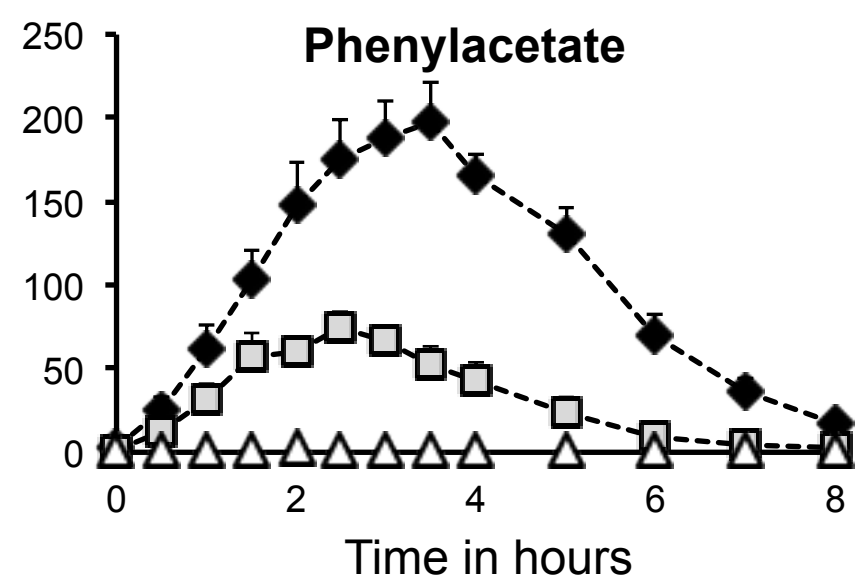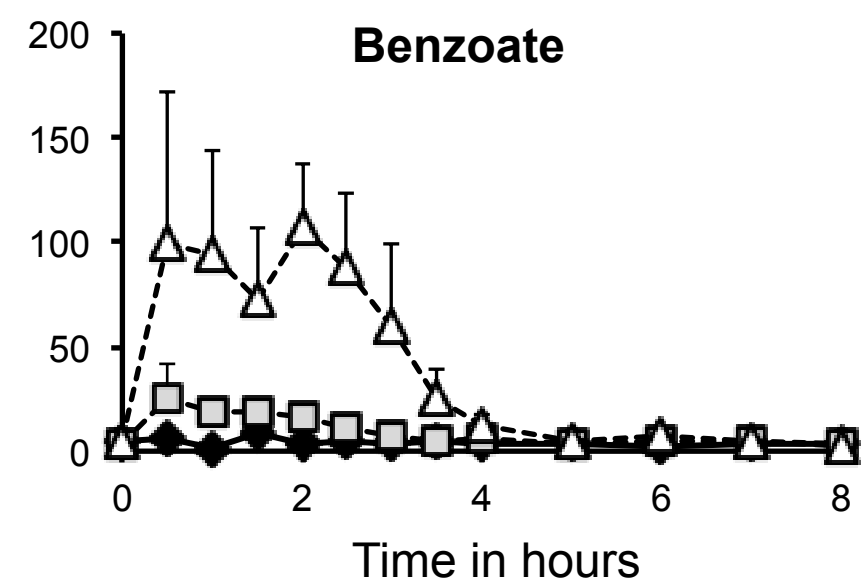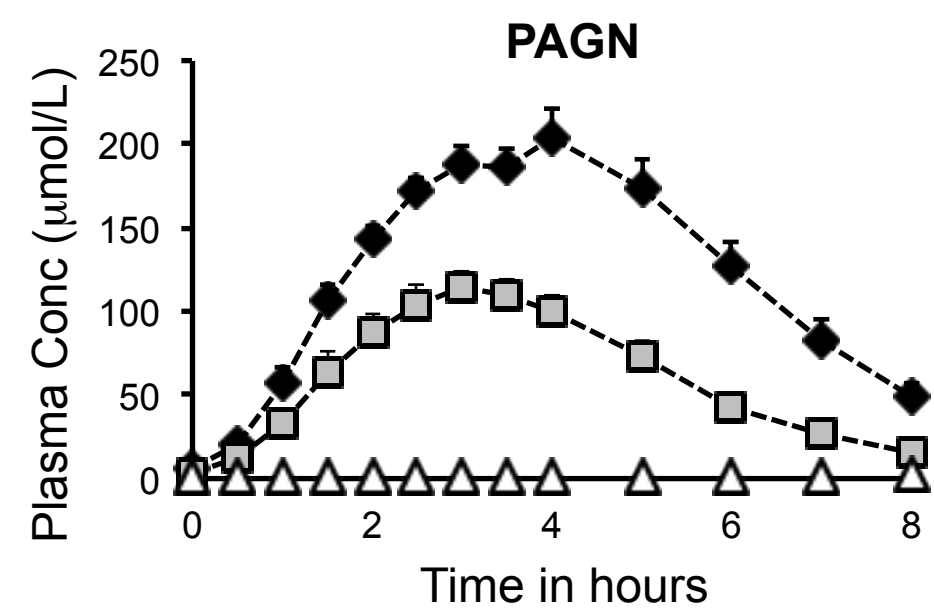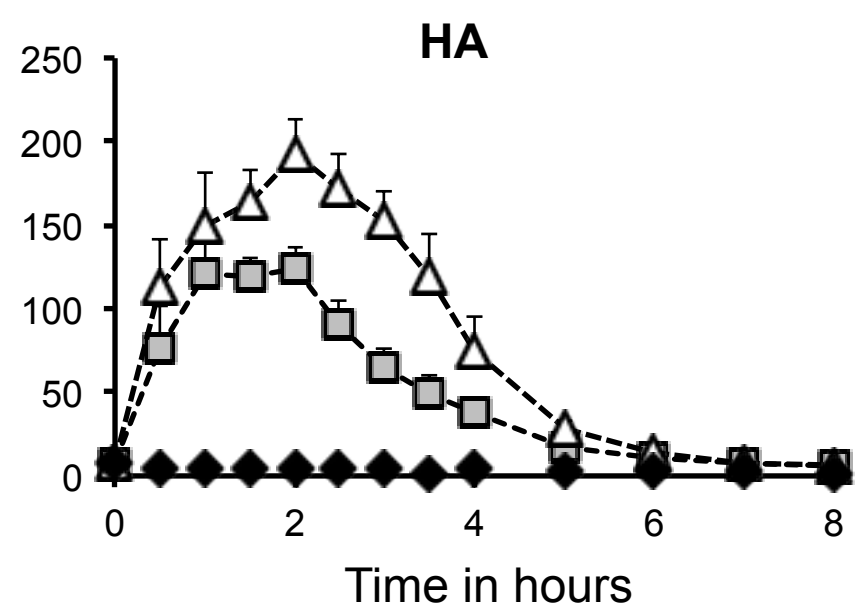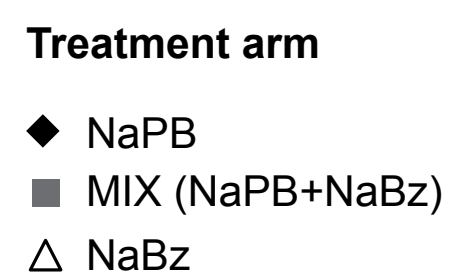

Supplement: NIHMS903128-supplement-Figure_S2.pdf [file NIHMS903128-supplement-Figure_S2.pdf]

A. Glutamine

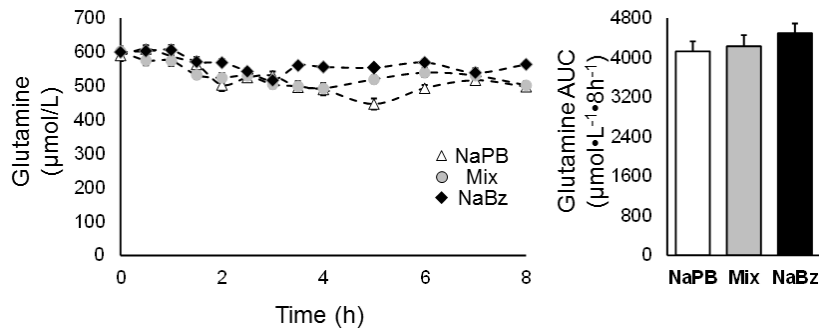

B. Glycine

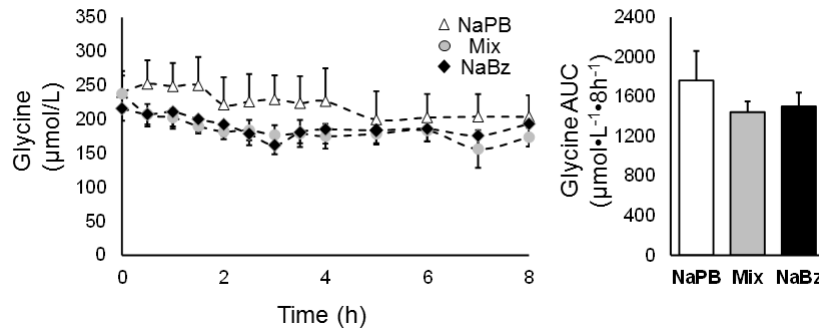

C. Leucine

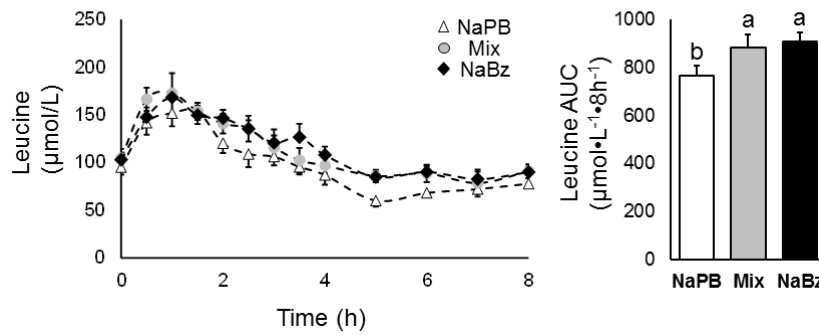

D. Tryptophan

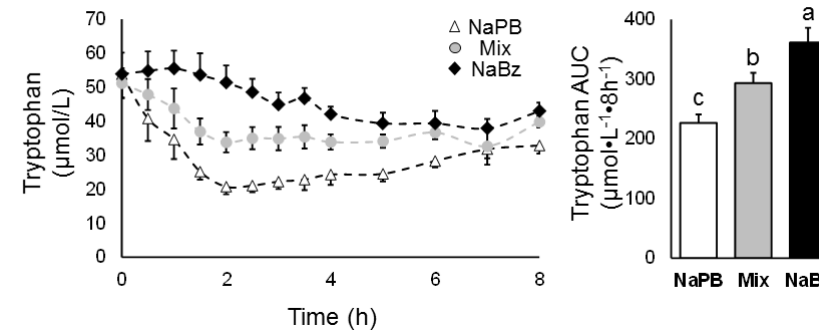

Supplement: NIHMS903128-supplement-Figure_S3.pdf [file NIHMS903128-supplement-Figure_S3.pdf]
